# Supplementary material for: Construction of consecutive deletions of the Escherichia coli chromosome
Source: PubMed Central journal article supplement — Mol Syst Biol. 2007 Aug 14;3:132. doi: 10.1038/msb4100174 (PMC1964801; doi:10.1038/msb4100174), 2007-08-14
Supplement: msb4100174-s4.pdf [file msb4100174-s4.pdf]

> mFSm2 (8210 bp)

AACATAACGAAAGGTAAAATACATAAGGCTTACTAAAAGCCAGATAACAGTATGCGTATTTGCGCGCTGATTTTT  
GCGGTATAAGAATATATACTGATATGTATACCCGAAAGTATGTCAAAAAGAGGTGTGCTATGAAGCAGCGTATTAC  
AGTGACAGTTGACAGCGACAGCTATCAGTTGCTCAAGGCATATGATGTCAATATCTCCGGTCTGGTAAGCACAAAC  
CATGCAGAATGAAGCCCGTCTGCTGCGTGCCGAACGCTGGAAAAGCGGAAAATCAGGAAGGGATGGCTGAGGTCGC  
CCGTTTTATTGAAATGAACGGCTCTTTTGTCTGACGAGAACAGGGACTGGTGAAATGCAGTTTAAGGTTTACACCT  
ATAAAAAGAGAGAGCCGTTATCGTCTGTTTGTGGATGTACAGAGTGATATTATGACACGCCCGGGCGACGGATGG  
TGATCCCCCTGGCCAGTGACGTCTGCTGTGATATAAAGTCTCCCGTGAACCTTACCCGGTGGTGATATCGGGG  
ATGAAAGCTGGCGCATGATGACCACCGATATGGCCAGTGTGCCGGTCTCCGTTATCGGGGAAAGTGGCTGATC  
TCAGCCACCGGAAAATGACATCAAAAACGCCATTAACCTGATGTTCTGGGGAATATAAATGTCAGGCTCCGTTA  
TACACAGCCAGTCTGCAGTCATGGTACCGGCAGTGTATTCTGCCGGCAGCCTGCATCGTGCCTGTTGCCATTG  
ATTATCCGGCAGCTCTGGCACTTCGCCAGATGTGATGGTCCATGATGAACTGCCAAAATATCTGCTGGCTCCGG  
AAGTGAGTGCCCTGCTCCATTACGTCCCGGATCTGCACCGCAAGATGCTGCTGGCCACACTGTGGAACACCGGAG  
CACGCATTAATGAAGCACTGGCGCTGACGCGGGGGGATTTTTGCTTGGCCTCCGATCCGTTTGTGCAGCTTG  
CGACCCTGAAACAACGGACCGAAAAGCTGCCAGGACGGCGGGGAGAATGCCCGCCGGTCAGCAGACTCACCGGC  
TGTTTCCGCTCTCTGACTCCTGGTACGTGACCCAGCTGCAGACGATGGTGGCACAACCTGAAAATACCCATGGAGC  
GGCGTAACCGTGCACAGGAAGGACAGAGAAAAGCGCGGATCTGGGAAGTGACGGACAGAACGGTCAGGACCTGGA  
TTGGGGAGGCGGTTGCCGCCGCTGCTGCTGACGGTGTGACGTTCTCTGTTCCGGTCACACCACATACGTTCCGCC  
ATTCCTATGCGATGCACATGCTGTATGCCGATATACCGTGAAGCTTCTGCAAAGCCTGATGGGACATAAGTCCA  
TCAGTTCAACGGAAGTCTACACGAAGGTTTTTGTGCTGGATGTGGCTGCCCGCACCGGTTGCGATATGCGT  
CGGAGTCTGATGCGGTTGCGATGCTGAAACAATTATCCTGAGAATAAATGCCCTTGGCCTTTATATGAAAATGTGG  
AACTGAGTGGATATGCTGTTTTTGTCTGTTAAACAGAGAAGCTGGCTGTTATCCACTGAGAAGCGAACGAAACAG  
TCGGGAAAATCTCCATTATCGTAGAGATCCGATTATTAATCTCAGGAGCCTGTGTAGCGTTTTATAGGAAGTAG  
TGTTCTGTGATGCTGCAAGCGGTAACGAAAACGATTTGAATATGCCCTTCAGGAACAATAGAAATCTTCGTG  
CGGTGTTACGTTGAAGTGGAGCGGATTATGTGACCAATGGACAGAACAACTAATGAACACAGAACCATGATGTG  
GTCTGTCTTTTTACAGCCAGTAGGCTCGCCGAGTCGAGCGACGGCGAAGCCCTCGAGTGAGCGAGGAAGCACCA  
GGGAACAGCACTTATATATTCTGCTTACACACGATGCCTGAAAAAACTTCCCTTGGGGTTATCCACTTATCCACG  
GGGATATTTTTATAATTATTTTTTTTATAGTTTTTATAGATCTTCTTTTTTTAGAGCGCCTTGTAGGCCCTTATCCAT  
GCTGGTTCTAGAGAAGGTGTTGTGACAAAATTGCCCTTTCAGTGTGACAAAATCACCTCAAATGACAGTCCCTGTCT  
GTGACAAAATTGCCCTTAAACCCTGTGACAAAATTGCCCTCAGAAGAAGCTGTTTTTTCACAAAAGTTATCCCTGCTTA  
TTGACTCTTTTTTATTAGTTAGTGTGACAATCTAAAACCTTGTACACTTACATGGATCTGTGATGGCGGAAACAGC  
GGTTATCAATCAAGAAGAACGTAATAAATAGCCCGGAATCGTCCAGTCAAACGACCTCACTGAGGCGGATATAG  
TCTCTCCCGGATCAAAAACGTATGCTGTATCTGTTGCTTACCAGATCAGAAAATCTGATGGCACCCTACAGGA  
ACATGACGGTATCTGCGAGATCCATGTTGCTAAAATATGCTGAAAATATTCCGATTGACCTCTGCGGAAGCCAGTAA  
GGATATACGGCAGGCATTGAAGAGTTTCGCGGGGAAGGAAGTGGTTTTTTTATCGCCCTGAAGAGGATGCCGGCGA  
TGAAAAGGCTATGAATCTTTTCTTGGTTTATCAAACGTGCGCACAGTCCATCCAGAGGGCTTTACAGTGTACA  
TATCAACCCATATCTCATTCCCTTCTTTATCGGGTTACAGAACCGGTTTACGCAGTTTTCGGCTTAGTGAAACAAA  
AGAAATCACCAATCCGATGCCATGCGTTTATACGAATCCCTGTGTGATGATCGTAAGCCGATGGCTCAGGCAT  
CGTCTCTCTGAAAATCGACTGGATCATAGAGCGTTACCAGCTGCCTCAAAGTTACCAGCGTATGCCGACTTCCG  
CCGCCGCTTCCCTGCAGGTCTGTGTTAATGAGATCAACAGCAGAACTCCAATGCGCCTCTCATAACATTGAGAAAA  
GAAAGGCCGCCAGACGACTCATATCGTATTTTTCTTCCGCGATATCACTTCCATGACGACAGGATAGTCTGAGGG  
TTATCTGTACAGATTTGAGGGTGGTTGCTCACATTTGTTCTGACCTACTGAGGGTAATTTGTCACAGTTTTGCT  
GTTTCTTTCCAGCTGCATGGATTTTTCTCATACTTTTTGAACGTGTAATTTTTAAGGAAGCCAAAATTTGAGGGCAGT  
TTGTCCAGTTGATTTCTCTTTCCCTTCCCTGCTGACCTGATGATATCGGGGGTTAGTTCGTATCATATTGATG  
AGGGTTGATTATCACAGTTTTACTCTGAATTGGCTATCCCGGTGTGTACCTTACCTGGAGTTTTTTCCACGG  
TGGATATTTCTTCTTGGCTGAGCGTAAGAGCTATCTGACAGAACAGTTCTTCTTTGCTTCTCGCCAGTTCGCT  
CGCTATGCTCGGTTACACGGCTGCGGCGAGCGCTAGTGATAAATAAGTACTGAGGTATGTGCTCTTCTTATCTCC  
TTTTGTAGTGTGCTCTTATTTTAAACAACCTTTGCGGTTTTTTGATGACTTTGCGATTTTGTGTTGCTTTGCGAG  
TAAATTGCAAGATTTAATAAAAAAACGCAAAGCAATGATTAAGGATGTTGAGAATGAAACTCATGGAACACTT  
AACCAGTGATAAACGCTGGTGCATGAAATGACGAAGGCTATCGCCATTGCACAGTTTAATGATGACAGCCCGGAA  
GCGAGGAAAATAACCCGGCGCTGGAGAATAGGTGAAGCAGCGGATTTAGTTGGGGTTTCTTCTCAGGCTATCAGA  
GATGCCGAGAAAGCAGGGCGACTACCGCACCCGGATATGGAAATTCGAGGACGGGTTGAGCAACGTGTTGGTTAT  
ACAATTGAACAAATTAATCATATGCGTGATGTGTTTGGTACGCGATTGCGACGTGCTGAAGACGTATTTCCACCG  
GTGATCGGGGTTGCTGCCATAAAGGTGGCGTTTACAAAACCTCAGTTTTCTGTTTCTGCTCAGGATCTGGCT  
CTGAAGGGCTACGTTGTTTGTCTGTTGAAGGTAACGACCCCGGAAACAGCCTCAATGTATCACGGATGGGTA  
CCAGATCTTATATTGATGACAGAACGACTCTCCCTTCTATCTTGGGAAAAGGACGATGTCATTAATGCA  
ATAAAGCCCACTTGGCTGGCCGGGGCTTGACATTATTCTTCTGTCTGGCTCTGCACCGTATTGAAAACCTGAGTTA  
ATGGGCAAATTTGATGAAGGTAAACTGCCACCGATCCACACCTGATGCTCCGACTGGCCATTGAAACTGTTGCT  
CATGACTATGATGTATAGTTATTGACAGCGCGCCTAACCTGGGTATCGGCACGATTAATGTCGTATGTGCTGCT  
GATGTGCTGATTGTTCCACGCCTGCTGAGTTGTTTACTACACCTCCGACTGCAGTTTTTTCGATATGCTTCCG  
GATCTGCTCAAGAACGTTGATCTTAAAGGGTTGAGCCTGATGTACGATTTTTGCTTACCAAATACAGCAATAGT  
AATGGCTCTCAGTCCCGTGGATGGAGGAGCAAATTCGGGATGCCTGGGGAAGCATGGTTCTAAAAAATGTTGTA  
CGTGAACGGATGAAGTTGGTAAAGGTGAGATCCGGATGAGAAGTGTTTTTGAAACAGGCCATTGATCAACGCTCT

TCAACTGGTGCCTGGAGAAATGCTCTTTCTATTTGGGAACCTGTCTGCAATGAAATTTTCGATCGTCTGATTAAA  
CCACGCTGGGAGATTAGATAATGAAGCGTGCGCCTGTTATTCCAAAACATACGCTCAATACTCAACCGGTTGAAG  
ATACTTCGTTATCGACACCAGCTGCCCGATGGTGGATTTCGTTAATTGCGCGCTAGGAGTAATGGCTCGCGGTA  
ATGCCATTACTTTGCCTGTATGTGGTCCGGATGTGAAGTTTACTCTTGAAGTGCTCCGGGGTGATAGTGTGAGA  
AGACCTCTCGGGTATGGTCAGGTAATGAACGTGACCAGGAGCTGCTTACTGAGGACGCACTGGATGATCTCATCC  
CTTCTTTTCTACTGACTGGTCAACAGACACCCGGCGTTCCGGTCGAAGAGTATCTGGTGTATAGAAAATGCGGATG  
GGAGTCGCCGTCGTAAAGCTGCTGCACCTTACCGAAAAGTGATTATCGTGTCTGGTTGGCGAGCTGGATGATGAGC  
AGATGGCTGCATTATCCAGATTGGGTAACGATTATCGCCCAACAAGTGCTTATGAACGTGGTCAGCGTTATGCAA  
GCCGATTGCAGAATGAATTTGCTGGAAAATATTTCTGCGCTGGCTGATGCGGAAAAATATTTACAGTAAGATTATTA  
CCCGCTGTATCAACACCGCCAAATTGCCTAAATCAGTTGTTGCTCTTTTTTCTCACCCCGGTGAACTATCTGCCC  
GGTCAGGTGATGCACCTTCAAAAAGCCTTTACAGATAAAGAGGAATTACTTAAGCAGCAGGCATCTAACCTTCATG  
AGCAGAAAAAAGCTGGGGTGATATTTGAAGCTGAAGAAGTTATCACTCTTTTAACTTCTGTGCTTAAAACGTCAT  
CTGCATCAAGAAGTAAAGCTCACGACATCAGTTTGTCTCCTGGAGCGACAGTATTGTATAAGGGCGATAAAA  
TGGTGCTTAACTGGACAGGTCTCGTGTTCAACTGAGTGTATAGAGAAAATGAGGCCATTCTTAAGGAACCTG  
AAAAGCCAGCACCTGATGCGACCACGTTTTAGTCTACGTTTATCTGTCTTTACTTAAATGTCCTTTGTTACAGGC  
CAGAAAGCATAACTGGCCTGAATATTCTCTCTGGGCCACTGTTCCACTTGTATCGTCGGTCTGATAATCAGACT  
GGGACCACGGTCCCCTCGTATCGTCGGTCTGATTATTAGTCTGGGACCACGGTCCCCTCGTATCGTCGGTCTG  
ATTATTAGTCTGGGACCACGGTCCCCTCGTATCGTCGGTCTGATAATCAGACTGGGACCACGGTCCCCTCGTA  
TCGTCCGTCTGATTATTAGTCTGGGACCACGGTCCCCTCGTATCGTCGGTCTGATTATTAGTCTGGGACCACGG  
TCCCCTCGTATCGTCGGTCTGATTATTAGTCTGGGACCACGGTCCCCTCGTATCGTCGGTCTGATTATTAGTCT  
TGGGACCACGGTCCCCTCGTATCGTCGGTCTGATTATTAGTCTGGGACCACGATCCCCTCGTGTGTCGGTCT  
GATTATCGGTCTGGGACCACGGTCCCCTGATTATTGTCGATCAGACTATCAGCGTGAGACTACGATTCCATCAAT  
GCCTGTCAAGGGCAAGTATTGACATGTGTCGTAACCTGTAGAACGGAGTAACCTCGGTGTGCGGTTGTATGCCT  
GCTGTGGATTGCTGCTGTGCTCTTATCCACAACATTTTGGCAGCGTTATGTGGACAAAATACCTGGTTACC  
CAGGCCGTGCCGGCACGTTAACACTTATTACGGCGTAGCACCAGGCGTTTAAAGGCACCAATAACTGCCTTAAAA  
AAATTACGCCCCGCCCTGCCACTCATCGCAGTACTGTTGTAATTCATTAAGCATTCTGCCGACATGGAAGCCATC  
ACAGACGGCATGATGAACCTGAATCGCCAGCGGCATCAGCACCTTGTGCGCTTGGCTATAATATTTGCCCATGGT  
GAAAACGGGGGCGAAGAAGTTGTCCATATTGGCCACGTTATAAAATCTCGAAAAATAATAGAGGGAAAAATCAGTTTT  
TGATATCAAAATTATACATGTCAACGATAATACAAAATATAATACAAAATATAAGATGTTATCAGTATTTATTAT  
GCATTTAGAATATTATTTGCCGACTACCTTGGTGTCTCGCCTTTCACGTAGTGGACAAAATCTTCCAACGTATC  
TGCCGCGAGGCCAAGCGATCTTCTTGTCCAAGATAAGCCTGTCTAGCTTCAAGTATGACGGGCTGATACTG  
GGCCGCGAGGCGCTCCATTGCCAGTCGGCAGCGACATCCTTCCGGCGGATTTTGCCGGTACTGCGCTGTACCA  
AATGCGGGACAACGTAAGCACTACATTTGCTCATCGCCAGCCAGTCGGGCGGAGTTCCATAGCGTTAAGGT  
TTCATTTAGCGCCTCAAATAGATCCTGTTTACAGGAACCGGATCAAAGAGTTCTTCCGCCGCTGGACCTACCAAGGC  
AACGCTATGTTCTCTTGTCTTTTGTGAGCAAGATAGCCAGATCAATGTGATCGTGGCTGGCTCGAAGATACTGC  
AAGAATGTCAATTGCGCTGCCATTCTCCAAATTGCAGTTCGCGCTTAGCTGGATAACGCCACGGAATGATGTCGTC  
GTGCACAACAATGGTGACTTCTACAGCGCGGAGAATCTCGCTCTCTCCAGGGGAAGCCGAAGTTTCCAAAAGGTC  
GTTGATCAAAGCTCGCCGCGTGTGTTTATCAAGCCTTACGGTACCGTAACCAGCAAATCAATACACTGTGTGG  
CTTACAGGCCCATCCACTGCGGAGCCGTACAAATGTACGGCCAGCAACGTCGGTTCGAGATGGCGCTCGATGAC  
GCCAACTACCTCTGATAGTTGAGTCGATACTTCCGGCGATCACCGCTTCCCTCATAATAAAACCTCCGATATTACA  
GTTGTAATTTTATAAATCAATAATATTACAATTGTAATATCGGTGTCAATAGTTTATTATAAATATTTGAAAGA  
AGGTGTTGAAATGGCTAAGTTATTACTGAAATGCCTCAAAATGTTCTTTACGATGCCATTGGGATATATCAACGG  
TGATATACAGTGTATTTTCTCCATTTTAGCTTCTTACGTAAGTCTCGATAACTCAAAAAATCAGC  
CCGGTAGTGACTTATTTTCAATTATGGTGAAGTTGGAACCTTACGTCGGATCAACGTCTCATTTTTCGCGAAA  
AGTTGGCCAGGGCTTCCCGGTATCAACAGGGACACCAGAAGCTTGGCGCGCTTAAATTAAGCGCGCGGATCC  
CCGGGAATTGTAATCATGGTCATAGCTGTTTCTGTGTGAAATGTTATCCGCTCACAAATCCACACAACATAC  
GAGCCGGAAGCATAAAGTGTAAGCCTGGGGTGCTAATGAGTGAGCTAACTCACATTAATTTGCGTTGCGCTCAC  
TGCCCGCTTTCCAGTCGGGAAACCTGTGCTGCCAG

> mFCm3-Gen (7428 bp)

aacataacgaaaggtaaaatacataaggcttactaaaagccagataacagtatgcgatattgcgcgctgattttt  
gcggtataagaatatatactgatatgtatacccgaagatgtcaaaaagaggtgtgctatgaagcagcgtattac  
agtgacagttgacagcgacagctatcagttgctcaaggcatatgatgtcaatatctccggtctggttaagcacaac  
catgcagaatgaagcccgtcgtctgctgcccgaacgctggaagcgggaaaatcaggaagggatggctgaggtcgc  
ccggtttattgaaatgaaacggctcttttctgctgacgagaaacagggactgggaaatgcagtttaaggtttacacct  
ataaaaagagagagccgttatcgtctgtttgtggatgtacagagtgatattattgacacgcccgggagcggatgg  
tgatccccctggccagtgacgctctgctgtcagataaagctctcccgtgaactttaccggtgggtgcataatcgggg  
atgaaagctggcgcatgatgaccaccgatatggccagtggtgcccgtctccgttatcggggaagaagtggtgatc  
tcagccaccgcaaaaatgacatcaaaaacgccattaacctgatgttctggggaatataaatgtcaggtccggtta  
tacacagccagctctgagtcaggtaccggcagtgattctgcccggcagcctgcatcgctgctgttgccattg  
attatccggcagctctggcacttcgcccagatgtcgatgggtccatgatgaactgcaaaaatctgctggtccgg

aagtgagtgccttgctccattacgtcccggatctgcaccgcaagatgctgctggccacactgtggaacaccggag  
cacgcattaatgaagcactggcgcctgacgcgccccgatttttcgcttgccgctccgatatccgcttctgagccttg  
cgaccctgaaacaacggaccgaaaaagctgccaggacggcggggagaatgcccgccggtcagcagactcaccggc  
tggttccgctctctgactcctggtagctcagccagctgcagacgatggtagcacaactgaaaaatcccacatggagc  
ggcgtaaccgctgcacaggaaggacagagaaagcgcggatctgggaagtgcaggacagaacgggtcaggacctgga  
ttggggaggcgggtggccgcccgtgctgctgacgggtgtagcttctctgttccggtcacaccacatacgttccgccc  
attcctatgacgatgcacatgctgtagtgcgggtataccgctgaaagttctgcaaagcctgatgggacataagcca  
tcagttcaacggaagtctacacgaaggttttgcgctggatgtggctgccccggcaccgggtgcagtttgcgatgc  
cggagtctgatgcgggtgacgatgctgaaacaattatcctgagaataaaatgccttggcctttatatggaaatgtgg  
aactgagtggatgctggtttttgtctgttaaacagagaagctggctgttatccactgagaagcgaacgaaacag  
tcgggaaaaatctcccattatcgtagagatccgcattattaatctcaggagcctgtgtagcgtttataggaagtag  
tgttctgtcatgatgcctgcaagcggtaaacgaaaacgatttgaatatgccttcaggaacaatagaaatcttcgtg  
cgggtgttacgttgaagtggagcggattatgtcagcaatggacagaacaacctaataaacacagaacatgatgtg  
gtctgtccttttacagccagtaggctcgccgcagtcgagcgcagggcgaagccctcgagtgcgaggaagcacca  
gggaacagcacttatatatctgcttacacacgatgcctgaaaaaacttcccttgggggttatccacttatccacg  
gggatatttttataattatttttttatagtttttagatcttcttttttagagcgcctttagaggcctttatccat  
gctggttctagagaaggtgtgtgacaaaatggcctttcagtgtagcaaatcaccctcaaatacagctcctgtct  
gtgacaaaatggccttaaccctgtgacaaaatggcctcagaagaagctgtttttcacaaagttatccctgctta  
ttgactcttttttatttttagtgtgacaatctaaaaactgtcacactcacatggatctgtcatggcggaaacagc  
ggttatcaatcacaagaacgtaaaaaatagcccgcgaatcgtccagtcacacgacctcactgagcggcagatag  
tctctcccgggatcaaaaacgtatgctgtatctgttcggtgaccagatcagaaaaatctgatggcaccctacagga  
acatgacggatctgacgatccatgttgctaaatatgctgaaatatcggattgacctctgcggaagccagtaaa  
ggatatacggcagggcattgaagagtttgcgggggaaggaagtggttttttatcgccctgaagaggatgccggcga  
tgaaaaaggctatgaatcttttccctgggtttatcaaacgtgacacagtcctacagagggtttacagtgtaaa  
tatcaaccatctcattcccttctttatcgggttacagaaccgggttacgcagtttccgcttagtgaacaaa  
agaaatcaccaatccgtagcctatgcctgttatacgaatccctgtgtcagtatcgtgaagccggatggctcaggcat  
cgtctctctgaaaaatcgactggatcatagagcgttaccagctgcctcaaagtaccagcgtatgcctgacttccg  
ccgcccgttccctgcaggctctgtgttaatgagatcaacagcagaactccaatgcgcctctcatacattgagaaaa  
gaaaggccgcccagacgactcatatcgtattttcccttccgcgatataccttccatgacgacaggatagctcagggg  
ttatctgtcacagatttgagggtgggttcgctcacatttgttctgacctactgagggttaattgtcacagttttgct  
gtttccctcagcctgcatggattttctcactttttgaaactgtaatttttaaggaagccaaatttgagggcag  
ttgtcacagttgatttcccttctcttccctctcctctcctctcctctcctctcctctcctctcctctcctctc  
agggttgattatcacagtttattactctgaattggctatccgcgctgtgtacctctacctggagtttttcccagc  
tggatatttcttcttgcgctgagcgtgaagagctatctgacagaacagttcttcttcttctcctcgcagttcgt  
cgctatgctcggttacacggctgcccgcgagcctagtgataaataagtgactgaggtatgtgctcttcttatctcc  
ttttgtagtggtgctcttatttttaacaactttgcgggttttttgatgactttgagattttgtgtgtgctttgcag  
taaatgcaagatttaataaaaaaacgcaagcaatgattaaaggatgttcagaatgaaactcatggaaacactt  
aaccagtgcaaaacgctgggtcatgaaatgacgaaggtatcgccattgcacagtttaatgatgacagcccggaa  
gaggggaaaaataaccggcgcgtggagaataggtgaagcagcggattaggtgggggttcttctcaggctatcaga  
gatgccgagaaagcagggcgactaccgcaccgggatatggaaatcgaggacgggttgagcaacgctgttggttat  
acaattgaacaaattaatcatatgctgatgtgtttggtacgcgattgacgagctgctgaagacgattttccaccg  
gtgatccgggttgcctgcccataaaaggtggcgtttacaaaacctcagtttctgttcatcttgcctcaggatctggct  
ctgaaggggtcagctgttttgcctcgtggaaggtaacgacccccagggaaacagcctcaatgatcacggatgggta  
ccagatctcattatcatgcagaagacactcctcgcctttctatcttggggaaaagggcagctgacttatgca  
ataaagcccacttgcctggcggggcttgacatttctcctctcctctcctctcctctcctctcctctcctctc  
atgggcaaatttgatgaaggtaaactgcccaccgatccacacctgatgctccgactggccattgaaactgttgc  
catgactatgatgtcatagttattgacagcgcgcctaacctgggtatcggcacgattaatgtcgtatgtgctgct  
gatgtgctgatgttcccacgcctgctgagttgtttgactacacctccgcactgcagtttttcgatatgcttctg  
gatctgctcaagaacgcttgatcttaaagggttcgagcctgatgtacgtattttgcttaccaaatcagcaatagt  
aatggctctcagctcccctggatggaggagcaaatcgggatgcctggggaagcatgggtctaaaaaatgttgta  
cgtgaaacggatgaagtgggtaaggtcagatccggatgagaactgtttttgaaacaggccattgatcaacgctct  
tcaactgggtgctggagaaatgctctttctatttgggaacctgtctgcaatgaaattttcgatcgtctgattaaa  
ccacgctgggagattagataatgaagcgtgcgctgtatttcaaaaacatacgtcaataactcaaccgggtgaa  
atacttctgttatcgacaccagctgccccgatgggtgattcgttaattgcgcccgtaggagtaattggctcgcggta  
atgccattactttgcctgtatgtggtcgggatgtgaagtttactctgaaagtgcctcgggggtgatagttgaga  
agacctctcgggtatgggtcaggtaatgaacgtgaccaggaagctgcttactgaggacgactggatgatctcacc  
cttctttctactgctgggtcaacagacaccggcgttcggctcgaagagatctgggtgctcagaaatggccgatg  
ggagtgcgctgtaaaagctgctgcacttaaccgaaagtgattatcgtgttctgggtggcggagctggatgatgagc  
agatggctgcattatccagattgggtaacgattatcgcccaacaagtgccttatgaacgctgggtcagcgttatgcaa  
gccgattgcagaatgaatttgcctggaaatatttctgcgctggctgatgcggaaaaatatttcacgtaagattatta  
cccgtgtatcaacaccgcaaatggcctaaatcagttgttgccttttttctcaccctgggtgaactatctgccc  
gggtcagggtgatgcacttcaaaaagcctttacagataaagaggaattacttaagcagcagggcatctaaccttcatg  
agcagaaaaaagctgggggtgatatttgaagctgaagaagttatcactcttttaacttctgtgcttaaaacgctcat

ctgcatcaagaactagtttaagctcacgacatcagtttgctcctggagcgacagtattgtataagggcgataaaa  
tgggtgcttaacctggacaggtctcgtggtccaactgagtgtagagaaaattgagggccattcttaaggaactg  
aaaagccagcaccctgatgacgaccaggttttagtctacggttatctgtctttacttaatgtcctttgttacaggc  
cagaaagcataaactggcctgaatattctctctgggcccactggtccacttgatcgtcggctgataatcagact  
gggaccacgggtcccactcgtatcgtcggctgattattagctctgggaccacgggtcccactcgtatcgtcggctg  
attattagctctgggaccacgggtcccactcgtatcgtcggctgataatcagactgggaccacgggtcccactcgt  
tcgctcggctgattattagctctgggaccacgggtcccactcgtatcgtcggctgataatcagactgggaccacgg  
tcccactcgtatcgtcggctgattattagctctgggaccacgggtcccactcgtatcgtcggctgataatcagct  
tgggaccacgggtcccactcgtatcgtcggctgattattagctctgggaccacgatcccactcgtgtgtcggctc  
gattatcggctctgggaccacgggtcccacttgattgtcgatcagactatcagcgtgagactacgattccatcaat  
gcctgtcaagggcaagattgacatgtcgtcgtaacctgtagaacggagtaacctcgggtgcggttgatgcct  
gctgtggattgctgctgtgctcctgcttatccacaacattttgcgacaggttatgtggacaaaatacctggttacc  
caggcctgcccggcacgtaaacTGGTGTCCCTGTTGATACCGGGAAGCCCTGGGCCAACTTTTGGCGAAAATGAG  
ACGTTGATCGGCACGTAAGAGGTTCCAACCTTTCACCATAATGAAATAAGATCACTACCGGGCGTATTTTTTGGT  
TATCGAGATTTTTAGGAGCTAAGGAAGCTAAAATGTTACGCAGCAGCAACGATGTTACGCAGCAGGGCAGTCGCC  
CTAAAACAAAGTTAGGTGGCTCAAGTATGGGCATCATTGCGACATGTAGGCTCGGCCCTGACCAAGTCAAATCCA  
TGCGGGCTGCTCTTGATCTTTTTCGGTCTGAGTTCGGAGACGTAGCCACCTACTCCAACATCAGCCGGACTCCG  
ATTACCTCGGGAACCTTGCTCCGTAGTAAGCAATTATCGCGCTTGCTGCTTCGACCAAGAAGCGGTTGTTGGCG  
CTCTCGCGCTTACGTTCTGCCCAGGTTTGAGCAGCCGCTAGTGAGATCTATATCTATGATCTCGCAGTCTCCG  
CGCAGCACCGGAGGCAGGGCATTGCCACCGCGCTCATCAATCTCCTCAAGCATGAGGCCAACCGCTTGGTGGCT  
ATGTGATCTACGTGCAAGCAGATTACGGTGACGATCCCCGAGTGGCTCTCTATACAAAAGTTGGGCATACGGGAAG  
AAGTGATGCACCTTGATATCGACCCAAGTACCGCCACCTAATTTTTTTAAGGCAGTTATTGGTGCCCTTAAACGC  
CTGGTGCTACGCCTGAATAAGTGAAGCTTGCGCCGCGGATCCCCGGGAATTCGTAATCATGGTCATAGCTGTTT  
CCTGTGTGAAATTGTTATCCGCTCACAAATCCACACAACATACGAGCCGGAAGCATAAAGTGTAAAGCCTGGGGT  
GCCTAATGAGTGAGCTAACTCACATTAATTGCGTTGCGCTCACTGCCCGCTTTCAGTTCGGGAAACCTGTCGTGC  
CAG

> mFCm4-2 (8794 bp)

aacataacgaaaggtaaaatacataaggcttactaaaagccagataacagtatgcgtatatttgccgctgattttt  
gcggtataagaataataactgatatgtatacccgagatgtcaaaaagaggtgtgctatgaagcagcgtattac  
agtgacagttgacagcagcagctatcagttgctcaagggcatatgatgtcaataatctccggtctggtgagcacaac  
catgcagaatgaagcccgtcgtctgcgtgcccgaacgctggaaagcggaaaatcaggaagggatggctgaggtcgc  
ccggtttattgaaatgaacggctcttttgcgtgacgagaacagggactgggtgaaatgcagtttaagggttacacct  
ataaaagagagagccggttatcgtctgtttgtggatgtacagagtgatattattgacacgcccgggagcaggtgg  
tgatccccctggccagtgacagctctgctgtcagataaagtctcccgtgaactttaccggtgggtgcataatcgggg  
atgaaagctggcgcagatgaccaccgatatggccagtggtgcccgtctccgttatcggggaagaagtggtgatc  
tcagccaccgcaaaaatgacatcaaaaacgccattaacctgatgttctggggaatataaatgtcaggctccgta  
tacacagccagctctgcagtcaggtaccggcagtgattctgcccggcagcctgcatcgtcctgttgccattg  
attatccggcagctctggcacttcgccagatgtcgatgggtccatgatgaactgccaaaaatctgctggctccgg  
aagtgagtgccctgctccattacgtcccggatctgcaccgcaagatgctgctggccacactgtggaacaccggag  
cacgcattaatgaagcactggcgtgacgcgggggatttttgccttgccctccgtatccgtttgtgcagcttg  
cgacctgaaacacagcagcggaaaagctgcccaggacggcggggagaatgcccgcgggtcagcagactcaccggc  
tggttccgctctctgactcctggtagctcagccagctgcagacgatgggtggcacaactgaaaatacccatggagc  
ggcgtaacctgacacaggaaggacagagaaaagcggatctgggaagtgacggacagaacggctcaggacctgga  
ttggggaggcgggtgcccgcgctgctgctgacgggtgacggttctctgttccggtcacaccacatacgttccgcc  
attcctatgcatgacatgctgtatgcccgtataaccgctgaaagtctgcaaaagcctgatgggacataaagtcca  
tcagttcaacggaagctctacacgaaggtttttgctggtggtggtgcccggcaccgggtgcagtttgcatg  
cggagctgatgcccgtgcatgaaacaattatcctgagaataaatgccttggcctttatattgaaatgtgg  
aactgagtgatgatgctgtttttgtctgttaaacagagaagctggctgttatccactgagaagcgaacgaaacag  
tcgggaaaatctccattatcgtagagatccgcattattaatctcaggagcctgtgtagcgtttataggaagtag  
tgttctgtcatgatgctgcaagcggtaacgaaaacgatttgaatatgccttcaggaacaatagaaatcttcgtg  
cgggtgtacgttgaagtgagcggattatgtcagcaatggacagaacaacctaatgaacacagaacctatgatgtg  
gtctgtccttttacagccagtaggctcgcgcagtcgagcgcagcggcgaagccctcgagtgagcaggaagcacca  
gggaacagcacttataattctgcttacacagatgctgaaaaaacttcccttggggttatccacttatccacg  
gggatattttataaatttttttagtttttagatcttcttttttagagcgcctgtaggccttatccat  
gctgggtctagagaaggtgtgtgacaaaattgccccttcagctgtgacaaaatcaccctcaaatgacagctcctgct  
gtgacaaaattgccccttaaccctgtgacaaaattgcccctcagaagaagctgtttttcacaaaagttatccctgctta  
ttgactcttttttatttagtgtagacaaatctaaaaacttgctcacacttcacatggatctgtcatggcggaaacagc  
ggttatcaatcacaagaaacgtaaaaatagcccgcgaatcgtccagtcacaacgacctcactgaggcggcatatag  
tctctcccgggatcaaaaacgtatgctgtatctgttcggtgaccagatcagaaaatctgatggcaccctacagga  
acatgacggatctgagcagatccatgttgctaaatattgctgaaatattcggattgacctctgaggaagccagtaa  
ggatatacggcagggcattgaagagtttcgcccgggaaggaagtggttttttatcgcctgaagaggatgcccggcga

tgaaaaaggctatgaatcttttcccttggtttatcaaacgtgcgcacagttccatccagagggctttacagtgtaaca  
tatcaaccatctcattcccttctttatcgggttacagaaccgggttacgcagtttcggcttagtgaaacaaa  
agaaatcaccaatccgtagtgcctgctttatacgaatccctgtgtcagtatcgtaagccggatggctcaggcat  
cgtctctctgaaaatcgactggatcatagagcgttaccagctgcctcaaagtaccagcgtatgctgacttccg  
ccgccgcttccctgcaggtctgtgttaatgagatcaacagcagaactccaatgcgctctcatacattgagaaaaa  
gaaagggccgagacgactcatatcgtatcttccctccgcgatatcacttccatgacgacaggatagctctgaggg  
ttatctgtcacagatttgaggggtggttcgctcacatttgtctgacctactgagggtaatttgtcacagtttctgct  
gtttcccttcagcctgcatggatcttctcatacttttgaactgtaatttttaaggaagccaaatttgagggcagt  
ttgtcacagttgatttcccttctcttcccttcgctcatgtgacctgatatcggggggttagttcgtcatcattgatg  
agggttgattatcacagtttattactctgaattggctatccgcgtgtgtacctctacctggagtttttcccacgg  
tggatatttcttcttgcgctgagcgttaagagctatctgacagaacagttcttcttcttctcctcgccagttcgt  
cgctatgctcgggttacacggctgcccgcgagcgttagtgataataagtgactgaggtatgtgctcttcttatctcc  
ttttgtagtggtgctcttatttttaacaactttgcggtttttgatgactttgctgattttgttgttctttgag  
taaatgcaagatttaataaaaaaacgcaagcaatgattaaaggatgttcagaatgaaactcatggaacactt  
aaccagtgcataaacgctgggtcatgaaatgacgaaggctatcgccattgcacagtttaatgatgacagcccggaa  
gagagaaaaataaccggcgctggagaataggtgaagcagcggattagttgggggttcttctcaggctatcaga  
gatgcccagaaaagcagggcgactaccgcaccggatggaaattcgaggacgggttgagcaacgtgttggttat  
acaattgaacaaattaatcatatgctgtatgtgttggtagcgcgactgacgagctgtgaagacgtatctccaccg  
gtgatcgggggtgctgcccataaagggtggcgtttacaaaacctcagttctgttcatctgtcaggatctggct  
ctgaaggggtcactggttttctgctcgtggaaggtaacgcaacccagggaaacagcctcaatgatcacggatgggta  
ccagatcttcatattcatgcaagaagcactctcctgccttctatcttggggaaaaagcagatgctacttatgca  
ataaagcccacttctgctggcgggggttgacattattccttctctgtctggctctgcaccgtattgaaactgagtta  
atgggcaaatttgatgaaggtaaaactgcccaccgatccacacctgatgctccgactggccattgaaactgttctgct  
catgactatgatgtcatagttattgacagcgcgcctaacctgggtatcgccacgattaatgtcgtatgtgctgct  
gatgtgctgatgttcccacgcctgctgagttgtttgactacacctccgcactgcagtttttctgatatgcttctg  
gatctgctcaagaacgttgatcttaaaggggttcgagcctgatgtacgtatcttcttaccaaatacagcaatagt  
aatggctctcagttcccctggatggaggagcaaatccgggatgcctggggaaagcatgggtcttaaaaaatgttcta  
cgtgaaacggatgaagttggtaagggtcagatccggatgagaactgtttttgaaacaggccattgatcaacgctct  
tcaactgggtgctggagaaatgctcttctatcttgggaacctgtctgcaatgaaatcttctgatcgtctgattaaa  
ccacgctgggagattagataatgaagcgtgcccctgttattccaaaacatacgtcaataactcaaccgggtgaaag  
atactcgttatcgacaccagctgcccagatgggtggaattcgttaattgcccgcgtaggagtaattggctcgcggt  
atgcccattactttgctgtatgtggtcgggatgtgaagttactcttgaagtgtccgggggtgatagttgtgaga  
agacctctcgggtatgggtcaggtaatgaacgtgaccaggagctgcttactgaggacgactggatgctcatcc  
cttcttcttctactgactgggtcaacagacaccggcgttcgggtcgaagagatctgggtgctatagaaaattgcccgatg  
ggagtgcgcgtcgtaaagctgctgcaactaccgaaagtgattatcgtgttctgggtggcgagctggatgatgagc  
agatggctgcatattccagattgggttaacgattatcgcccaacaagtgtcttatgaacgtgggtcagcgttatgcaa  
gccgattgcagaatgaatttctgctggaaatatttctgcgctggctgatgcccgaataatttccagtaagattatta  
cccgtgtatcaacaccgcccatttgcctaaatcagttgttctcttcttctcaccctgggtgaaactatctgccc  
gggtcaggtgatgcacttcaaaaagcctttacagataaagaggaattacttaagcagcagggcatcaacctcatg  
agcagaaaaaagctgggggtgatatttgaagctgaagaagttatcactctttaaacttctgtgcttaaaacgtcat  
ctgcatcaagaactagtttaagctcacgacatcagtttctcctggagcagcagtatgtataagggcgataaaa  
tgggtgcttaacctggacaggtctcgtgttccaactgagtgatagagaaaaattgaggccattcttaaggaacttg  
aaaagcagcaccctgatgagaccacgttttagtctcagtttatctgtcttacttaatgtcctttgttacagggc  
cagaagaacataactggcctgaatattctctcgtggcccactgttccacttgatcgtcggctgataatcagact  
gggaccacgggtcccactcgtatcgtcgggtcgtatattagctcgggaccacgggtcccactcgtatcgtcgtctg  
attattagctcgggaccacgggtcccactcgtatcgtcgggtcgtataatcagactgggaccacgggtcccactcgt  
tcgtcgggtcgtattattagctcgggaccatgggtcccactcgtatcgtcgggtcgtattattagctcgggaccacgg  
tcccactcgtatcgtcgggtcgtattattagctcgggaccacgggtcccactcgtatcgtcgggtcgtattattagct  
tgggaccacgggtcccactcgtatcgtcgggtcgtattattagctcgggaccacggatcccactcgtgttctcggct  
gattatcgggtcgtgggaccacgggtcccacttgatttctcgtatcagactatcagcgtgagactacgattccatcaat  
gcctgtcaagggcaagattgacatgtcgtcgtaacctgtagaacggagtaacctcgggtgctcgggtgtatgcct  
gctgtggattgctgctgtgtcctgcttatccacaacattttgcccacgggttatgtggacaaaaataacctgggtacc  
cagggcgtgcccggcagcttctGGCGAAAAGGGGGATGTGCTGCAAGGCGATTAAGTTGGGTAACGCCAGGGTTTTT  
CCAGTCACGACGTTGTA AAAACGACGGCCAGTGCCAAGCTTGGCTGCAGGTCctgtaatccgggcagcgcacaacgga  
acattcatcagtgtaaaaaatggaatcaataaagccctgcccagcgcgcaggggtcagcctgaatacgcgtttaatg  
accgacagctcgtgatggcaaggtcagaatagcgtgagggctgcctcgtgaagaaggtgtgctgactcatac  
cagcctgaatcgccccatccagccagaaagtgaagggagccacgggttgatgagagctttgttgtatagtgagac  
cagttgggtgattttgaaacttttcttggccacggaacgggtctgcgttctcgggaagatgctgctgatctgatcctc  
aactcagcaaaaagttcgattttatcaacaaaagccgcgtcccgtcaagtcagcgtaatgctctgccagtggtaca  
accaattaaccaattctgattagaaaaactcatcgagcatcaaatgaaactgcaattttatcatatcaggattat  
caataccatatttttgaaaaagcggtttctgtaataagggagaaaactcaccgagggcagttccataggatggcaa  
gatcctgggtatcgggtctgcgattccgactcgtccaacatcaatacaacctattaatttccctcgtcaaaaaataa  
ggttatcaagtgagaaatcaccatgagtgacgactgaaatccgggtgagaatggcaaaaagcttatgcatcttcttcc

agacttgttcaacagggccagccattacgctcgatcaaaaatcactcgcatcaaccaaacggtattcattcgtg  
attgcgctgagcgagacgaaatacgcgatcgctgttaaaaggacaattacaaacaggaatcgaatgcaaccggc  
gcaggaacactgccagcgcatcaacaatattttcacctgaatcaggatattcttctaatacctggaatgctgttt  
tcccggggatcgagtggtgagtaaccatgcatcatcaggagtagggataaaaatgcttgatggcggaagaggca  
taaattccgctcagccagtttagtctgaccatctcatctgtaacatcattggcaacgctacctttgcatgtttca  
gaaacaactctggcgcatcgggcttcccatacaatcgatagattgtcgacactgattgcccagacattatcgGCGG  
CCGCTGGTGTCCCTGTTGATACCGGGAAGCCCTGGGCCAACTTTTGGCGAAAATGAGACGTTGATCGGCACGTAA  
GAGGTTCCAACCTTTCACCATAATGAAATAAGATCACTACCGGGCGTATTTTTGAGTTATCGAGATTTTCAGGAG  
CTAAGGAAGCTAAAATGGAGAAAAAATCACTGGATATAACCACCGTTGATATATCCCAATGGCATCGTAAAGAAC  
ATTTTGAGGCATTTTCAGTCAGTTGCTCAATGTACCTATAACCAGACCGTTTCAGCTGGATATTACGGCCTTTTAA  
AGACCGTAAAGAAAAATAAGCACAAGTTTTATCCGGCCTTTATTACATTCTTGCCCGCTGATGAATGCTCATC  
CGGAATTCGATGGCAATGAAAGACGGTGAGCTGGTGATATGGGATAGTGTTACCCCTTGTTACACCGTTTTCC  
ATGAGCAAACCTGAAACGTTTTTCATCGCTCTGGAGTGAATACCACGACGATTTCCGGCAGTTTCTACACATATATT  
CGCAAGATGTGGCGTGTACGGTGAAAACCTGGCCTATTTCCCTAAAGGGTTTATTGAGAATATGTTTTTCGTCT  
CAGCCAATCCCTGGGTGAGTTTTACCAGTTTTGATTTAAACGTGGCCAATATGGACAACCTTCTTCGCCCCCGTTT  
TCACCATGGGCAAATATTATACGCAAGGCGACAAGGTGCTGATGCCGCTGGCGATTTCAGGTTTCATCATGCCGTCT  
GTGATGGCTTCCATGTCCGCAGAATGCTTAATGAATTACAACAGTACTGCGATGAGTGGCAGGGCGGGCGTAAT  
TTTTTTAAGGCAGTTATTGGTGCCCTTAAACGCCTGGTGCTACGCCTGAATAAGTGCGGCCGGAATTCGTAATC  
ATGGTCATAGCTGTTTCCTGTGTGAAATTGTTATCCGCTCACAATTCACACACAACATACGAGCCGGAAGCATAAA  
GTGTAAAGCCTGGGGTGCCCTAATGAGTGAGCTAACTCACATTAATTGCGTTGCGCTCACTGCCCGCTTTCAGTC  
GGGAAACCTGTCGTGCCAG
